# Supplementary material
Source: HighWire-hosted journal article supplement (http://www.jneurosci.org/highwire/filestream/599933/field_highwire_adjunct_files/4/Supplemental_Legend.pdf)
Supplement: Supplemental_Legend.pdf [file Supplemental_Legend.pdf]

## Supporting Online Material

### Audio Files

**S1.** An example of sound stimuli in the new music system: Standard condition.

**S2.** An example of sound stimuli in the new music system: Deviant condition.

**S3.** An example of sound stimuli in the new music system: Fadeout condition.

**Supplemental Figure 1.** Schematic of stimuli design in the behavioral follow-up experiment.

Each number represents one possible value of  $n$  in the Bohlen-Pierce scale equation,  $F = k \cdot 3^{(n/12)}$ . Thus, each number represents a tone with a certain frequency. Each vertical column of three numbers represents a three-note chord from the EEG experiment (as in Fig. 1 in main text). Thus, the four columns of numbers represents a progression of four chords. The arrows represent possible relationships between tones: each tone has arrows leading to one of several subsequent tones. The darker arrows represent one example pathway used to form an eight-note melody from the chord progression.
